# Supplementary material
Source: PubMed Central journal article supplement (PMC2843190)

## Supplementary data

### Material and Methods

**RT-PCR** – Total mRNA was isolated from cells as described (1). DNA amplification conditions included an initial denaturation step of 7 min at 95° C, and 36 cycles of 30 sec at 95° C, 30 sec at 60° C, 30 sec at 72° C, and finally 7 min at 72° C. Primers used are listed in the Table 2.

Table 2. Primers used in RT-PCR

| Gene                 | Forward primer 5'-3'     | Reverse primer 5'-3'     |
|----------------------|--------------------------|--------------------------|
| Human $\alpha$ 2A-AR | AACGAGGTCATGGGCTACTG     | CTGGTAGATGCGCACGTAGA     |
| Rat TRPM8            | AGTACCACATATGACTTCTCCCAC | ACAAGGTAATTCTCCTTCATGACG |
| Human HPRT           | GGCGTCGTGATTAGTGATGAT    | CGAGCAAGACGTTTCAGTCCT    |
| Rat $\alpha$ 2A-AR   | ATTTTCAACCACGACTTCCG     | TGTCCCTCTCAGCCAGAACT     |
| Rat HPRT             | TAAGTTCTTTGCTGACCTGCTG   | CCCGTTGACTGGTCATTACA     |

**Biotinylation assay and immunoblotting** – HEK-293<sub>M8</sub> cells were subjected to cell surface biotinylation as described in (2). Next, cells were precipitated after lysis with neutravidin-agarose beads (Pierce Rockford, IL, USA). Immunoblot analysis was performed for TRPM8 expression in the plasma membrane fraction (TRPM8<sub>PM</sub>) and in the total cell lysates (TRPM8<sub>TL</sub>). As negative control, non-induced (NI) HEK-293<sub>M8</sub> or non-transfected HEK-293 (NT) cells were used.

For the immunoblot analysis we have used the anti-TRPM8 antibody (1/2000, Abcam), Anti- $\alpha$ 2A adrenergic receptor (1:250, sc-28983, Santa Cruz Biotechnology) and Anti-calnexin (1:1000, MAB3126, Milipore).

### Legend

**Supplementary data figure S1.** *A.* RT-PCR analysis of the  $\alpha$ 2A-ARs (h  $\alpha$ 2A-AR) expression in HEK-293<sub>M8</sub> cells. Human form of Hypoxanthine-Guanine-Phospho-Ribosyl- Transferase (h HPRT) is used as control. *B.* Immunoblotting showing co-detection of human forms of  $\alpha$ 2A-ARs (h  $\alpha$ 2A-AR) and TRPM8 (h TRPM8) in HEK-293<sub>M8</sub> cells transfected with  $\alpha$ 2A-AR plasmid. The human form of calnexin (h calnexin) is used as expression control. *C.* RT-PCR analysis of TRPM8 and  $\alpha$ 2A-ARs expression in cultured rat DRG neurons. *D.* Biotinylation assay showing plasma membrane expression of TRPM8 channels (TRPM8<sub>PM</sub>) in HEK-293<sub>M8</sub> cells non induced by tetracycline (NI) or induced (TRPM8), in presence or not (CTRL) of PKA inhibitors H9 and KT5720. *E.* Biotinylation assay showing plasma membrane expression of TRPM8 channels (TRPM8<sub>PM</sub>) in HEK-293 cells transfected with TRPM8 (TRPM8) or mutants S9A and T17A. Non-transfected HEK-293 (NT) cells were used as negative control. Expression of TRPM8 in total cell lysates (TRPM8<sub>TL</sub>) is shown below the TRPM8<sub>PM</sub> blot for both D and E panels.

**Supplementary data figure S2.** *A.* Averaged I-V relationships of menthol (triangles) and cold (circles)-activated I<sub>TRPM8</sub> before (black) and after (open) exposure to a short pretreatment of clonidine (1-3 minutes, mean  $\pm$  s.e.m., n = 8). *B.* quantification of the effects of a short incubation of clonidine on the density of menthol and cold-activated I<sub>TRPM8</sub> at + 100 mV (mean  $\pm$  s.e.m., n = 8 for each condition). *C.* Quantification of the inhibitory effect of clonidine in HEK-293<sub>M8- $\alpha$ 2A-AR</sub> cells with TRPM8-activating stimuli perfused successively (mean  $\pm$  s.e.m., n = 5-10 for each condition); (\*), (\*\*) and (\*\*\*) denote statistically significant differences with P<0.05, P<0.02 and P<0.01, respectively.

## References

1. Thebault, S., Lemonnier, L., Bidaux, G., Flourakis, M., Bavencoffe, A., Gordienko, D., Roudbaraki, M., Delcourt, P., Panchin, Y., Shuba, Y., Skryma, R., and Prevarskaya, N. (2005) *J Biol Chem* 280(47), 39423-39435
2. Gkika, D., Topala, C. N., Chang, Q., Picard, N., Thebault, S., Houillier, P., Hoenderop, J. G., and Bindels, R. J. (2006) *Embo J* 25(20), 4707-4716

# Supplementary data S1

A

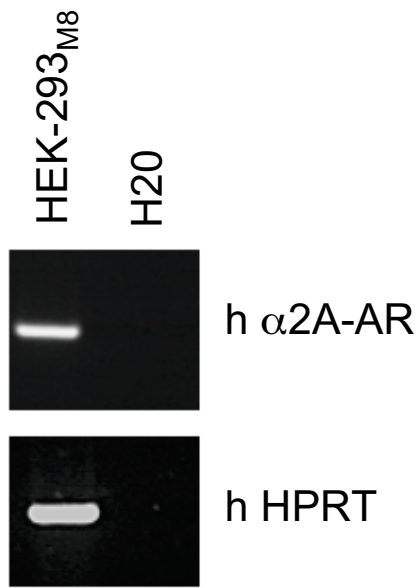

B

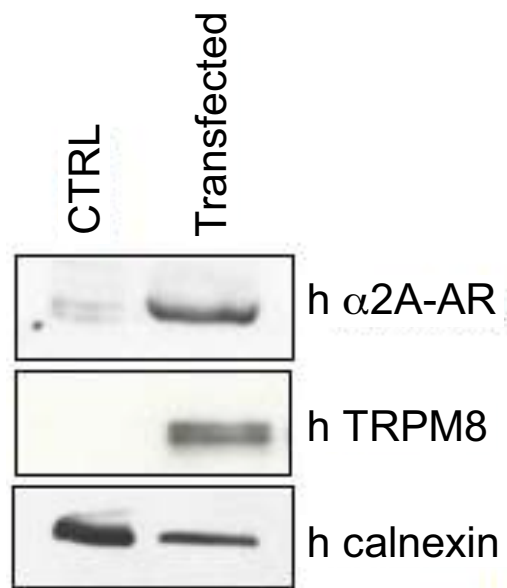

C

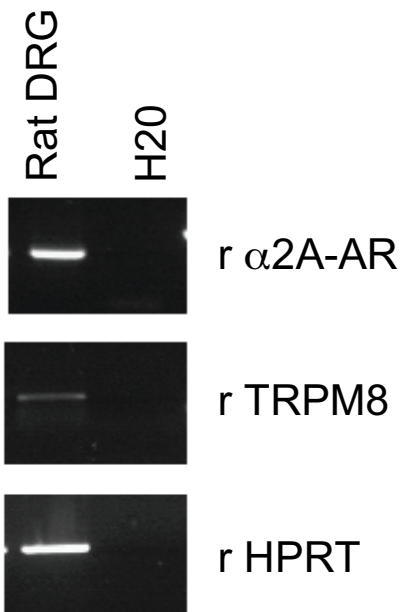

D

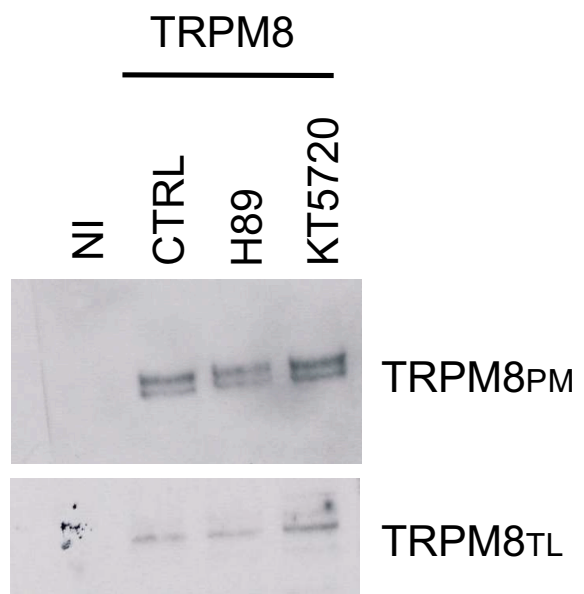

E

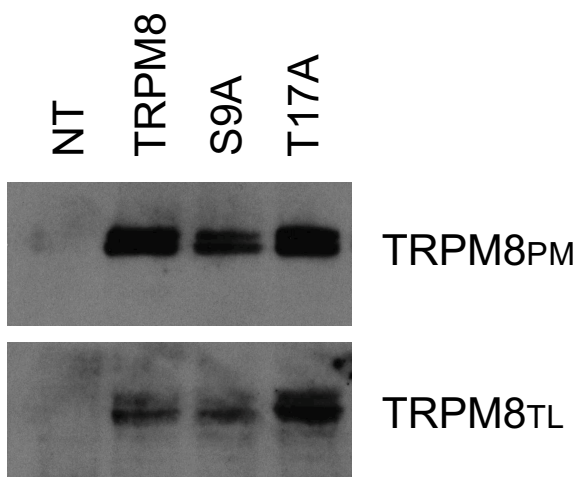

# Supplementary data S2

A

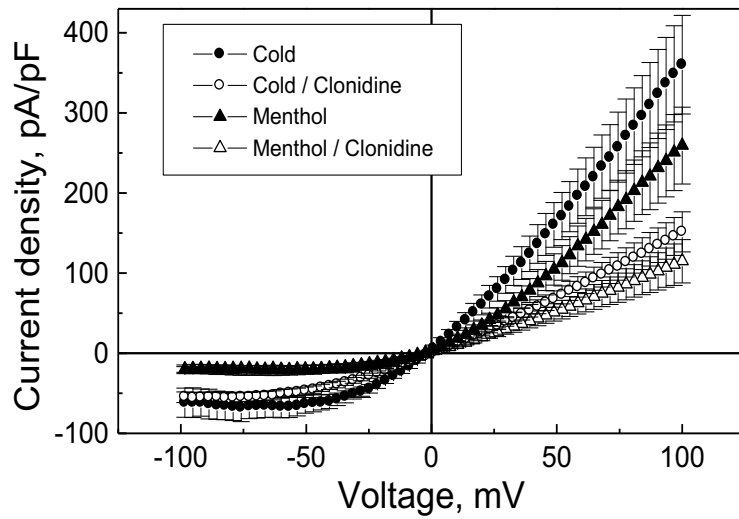

B

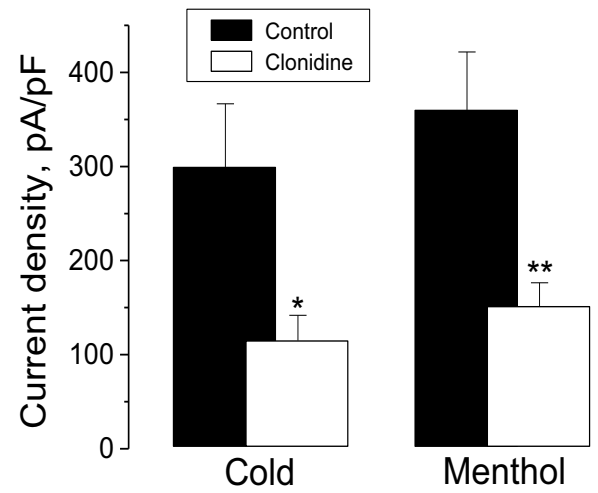

C

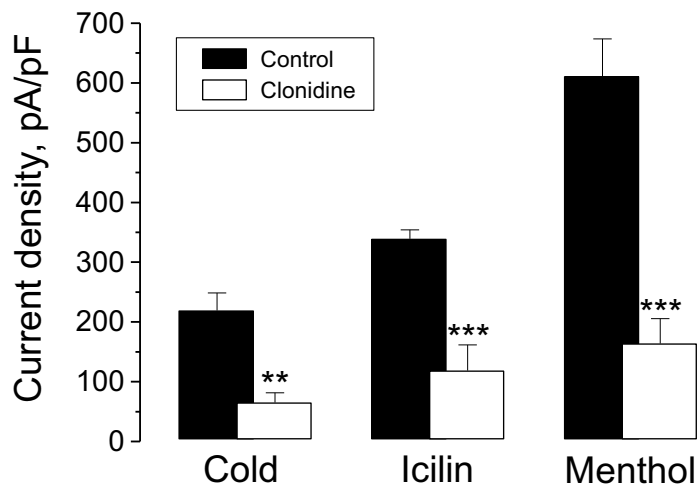

Supplement: supp_M109.069377_jbc.M109.069377-1.pdf [file supp_M109.069377_jbc.M109.069377-1.pdf]
